# Supplementary material for: Discovery of modulators for the PD-1/PD-L1 interaction by molecular simulation and bioassay
Source: Royal Society of Chemistry journal article supplement (doi:10.1039/d1nj02030g), 2021-01-01
Supplement: d1nj02030g1.pdf [file d1nj02030g1.pdf]

## Supplementary information

### Discovery of modulator for PD-1/PD-L1 interaction by molecular simulation and bioassay

Guangping Li<sup>a</sup>, Haiqiong Guo<sup>d</sup>, Linan Zhao<sup>a</sup>, Huixian Feng<sup>e</sup>, Huawei He<sup>f</sup>, Yan Chen<sup>g,\*</sup>,  
Yuanqiang Wang<sup>a,b,c\*</sup>, and Zhihua Lin<sup>a,b,c</sup>

<sup>a</sup>School of Pharmacy and Bioengineering, Chongqing University of Technology, Chongqing, China, 400054

<sup>b</sup>Chongqing Key Laboratory of Medicinal Chemistry & Molecular Pharmacology, Chongqing University of Technology, Chongqing, China, 400054.

<sup>c</sup>Key Laboratory of Target Based Drug Screening and Activity Evaluation, Chongqing University of Technology, Chongqing, China, 400054.

<sup>d</sup>State Key Laboratory of Silkworm Genome Biology, Southwest University, Chongqing, China, 400716

<sup>e</sup>Guangzhou Women and Children's Medical Center, Guangzhou Medical University, Guangzhou, China, 510005

<sup>f</sup>Biological Science Research Center, Southwest University, Chongqing, China, 400716

<sup>g</sup>College of Pharmacology Sciences, Zhejiang University of Technology, Hangzhou, China, 310014

\* Corresponding author E-mail:

Yan Chen, chenyan2008@zjut.edu.cn; Yuanqiang Wang, wangyqnn@cqut.edu.cn

**New Journal of Chemistry**

## 1. The characterization of synthetic novel tripeptides

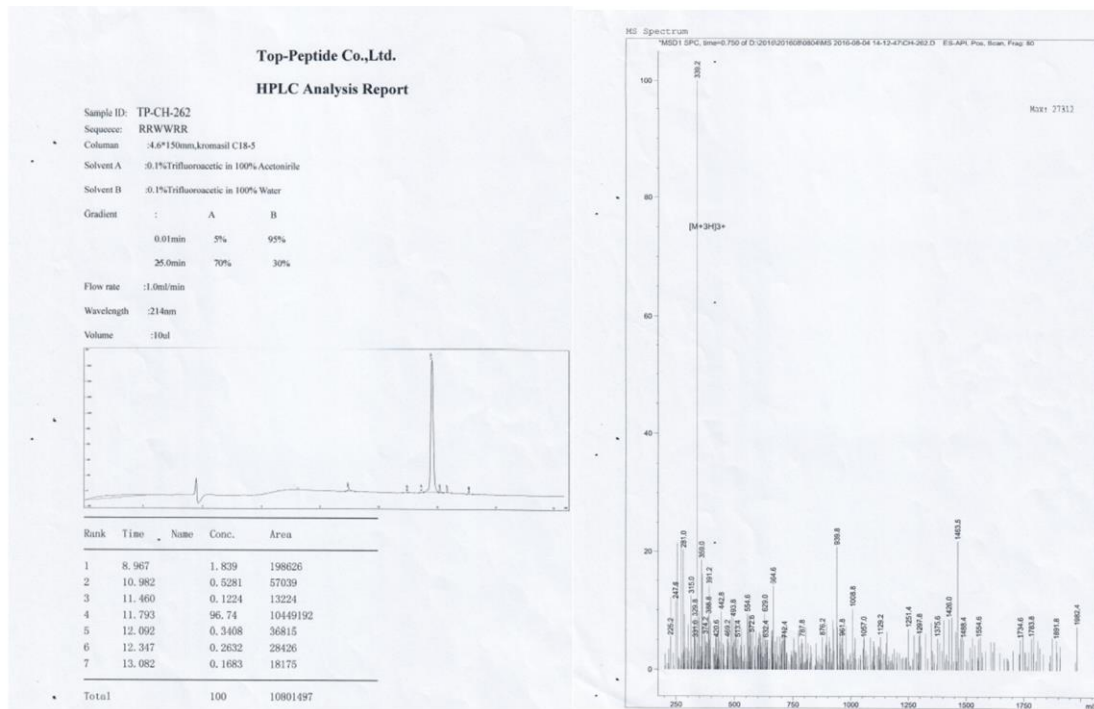

Figure S1. Characterization of RRWRR-NH2 by analytical HPLC chromatogram and MS Spectrum.

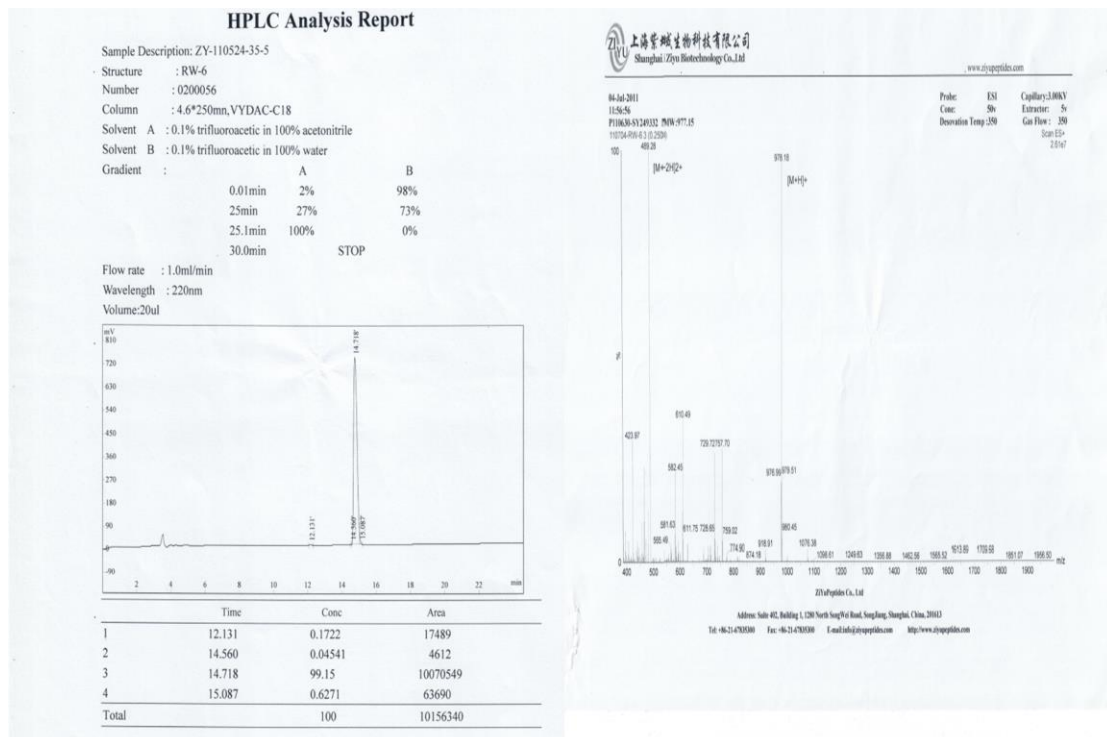

Figure S2. Characterization of RRQFW-NH2 by analytical HPLC chromatogram and MS Spectrum.

## 2. Energy decomposition analysis (EDA) of complex PD-1/peptide

Table S1. Energy decomposition analysis (EDA) of complex RRWWRR-NH<sub>2</sub>

| Name   | van der waals | Electrostatic | Polar    | MMGBSA   |
|--------|---------------|---------------|----------|----------|
| VAL64  | -0.6829       | 0.6142        | -0.4514  | -0.64686 |
| ASN66  | -0.55035      | 0.3973        | 0.2983   | 0.123476 |
| TYR68  | -1.92275      | -0.6625       | -0.13515 | -2.84923 |
| ASN74  | -0.21315      | -1.4625       | 1.8569   | 0.171361 |
| GLN75  | -1.72905      | -1.48805      | 2.2508   | -1.10114 |
| THR76  | -2.0394       | -12.4872      | 8.93625  | -5.97625 |
| ASP77  | -0.72905      | -75.9729      | 73.3841  | -3.42004 |
| LYS78  | -2.214        | 70.65795      | -68.9956 | -0.94493 |
| ASP85  | -1.44435      | -101.452      | 99.2522  | -3.90088 |
| SER87  | -1.3786       | 3.688         | -3.5116  | -1.47547 |
| ILE126 | -1.99375      | 0.7337        | -0.96885 | -2.4128  |
| LEU128 | -0.8119       | -1.21145      | 1.58785  | -0.68814 |
| ALA132 | -0.7037       | -1.3771       | 1.64475  | -0.55279 |
| ILE134 | -1.95785      | -0.73645      | 1.7693   | -1.1459  |
| GLU136 | -0.01895      | -91.4497      | 85.6323  | -6.04266 |

Table S2. Energy decomposition analysis (EDA) of complex RRQFW-NH<sub>2</sub>

| Name   | van der waals | Electrostatic | Polar    | MMGBSA   |
|--------|---------------|---------------|----------|----------|
| VAL64  | -0.3814       | 0.72345       | -0.3671  | -0.12618 |
| ASN66  | -0.7169       | -0.5827       | 1.1904   | -0.16014 |
| TRP67  | -0.1043       | -0.89945      | 0.7542   | -0.24955 |
| TYR68  | -1.28835      | -4.16515      | 3.3758   | -2.27494 |
| ASN74  | -0.0732       | -0.0018       | 0.196    | 0.114917 |
| GLN75  | -0.1947       | -0.10495      | 0.3794   | 0.070663 |
| THR76  | -1.5031       | -1.11715      | 2.2865   | -0.67181 |
| ASP77  | -1.22445      | -29.377       | 29.9599  | -0.81426 |
| LYS78  | -0.00335      | 0.1404        | -0.1474  | -0.01035 |
| ASP85  | -0.8737       | -60.5576      | 59.2912  | -2.32271 |
| SER87  | -0.1613       | -0.39065      | 0.53515  | -0.071   |
| ILE126 | -1.7918       | 0.41815       | -0.19745 | -1.77394 |
| LEU128 | -0.18705      | -0.2162       | 0.3507   | -0.09934 |
| ALA132 | -0.0777       | 1.3128        | -1.2784  | -0.0434  |
| ILE134 | -2.6856       | 0.4765        | -0.1165  | -2.60596 |
| GLU136 | -0.87365      | -30.8354      | 31.35285 | -0.57908 |

### 3 SPR measurement of PD-1/peptides to immobilized PD-L1

**Kinetics: 'PD-L1', fit: '1. 1:1 Binding'**

Sample: PD-L1 Temp: 25°C Curve: Fc=2-1

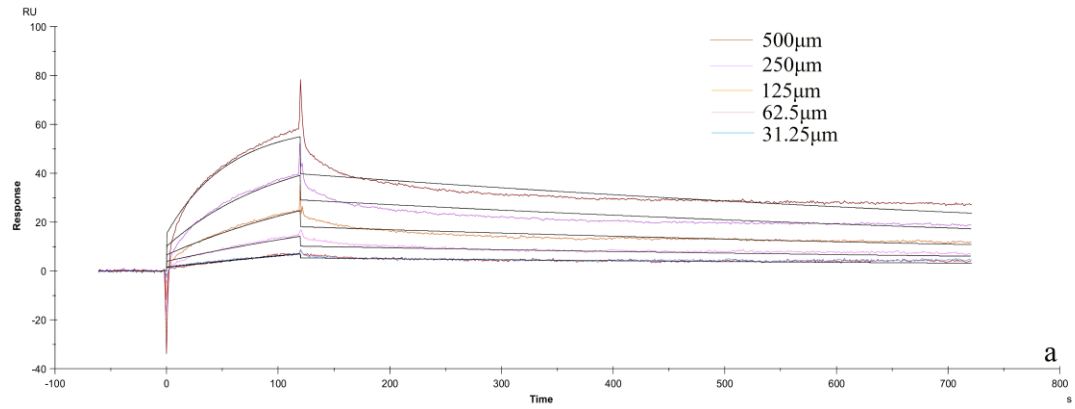

**Kinetics: 'RRWRR 3', fit: '1. 1:1 Binding'**

Sample: RRWRR Temp: 25°C Curve: Fc=2-1

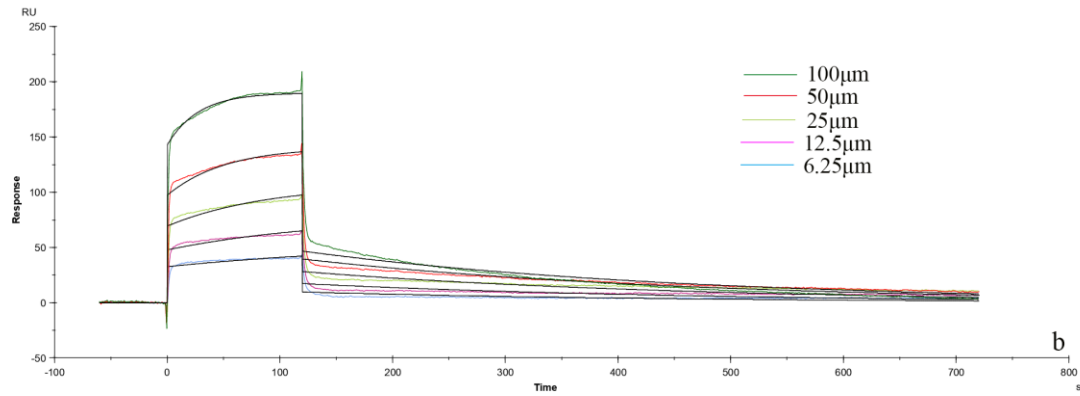

**Kinetics: 'RRQFW', fit: '1. 1:1 Binding'**

Sample: RRQFW Temp: 25°C Curve: Fc=2-1

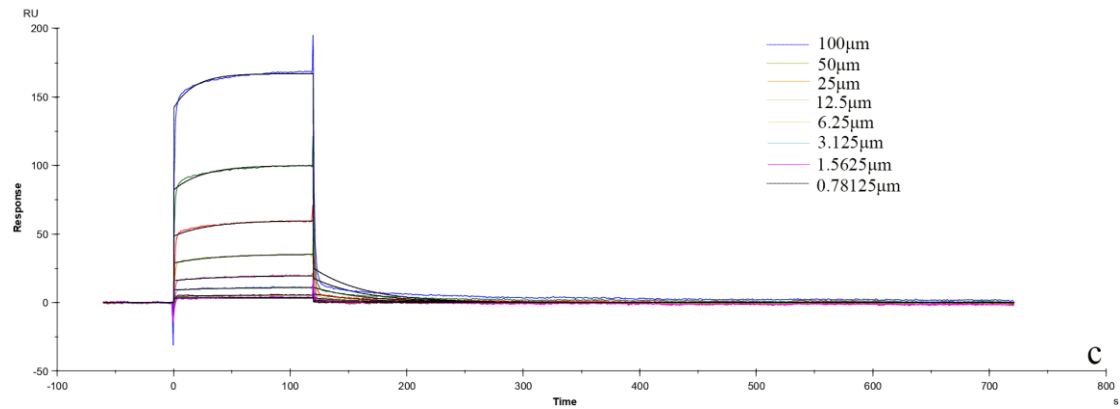

Figure S3. Affinity between PD-1 and peptides (PD-L1(a)/RRWRR (b)/RRQFW(c)). A series of concentrations of peptides (PD-L1) were run over PD-1 to obtain the affinity between PD-1 and peptides (PD-L1) by kinetic analysis.

**4. Competitive inhibition of peptide inhibitors on PD-1/PD-L1**

**Kinetics: 'RRWRRR', fit: '1. 1:1 Binding'**

Sample: RRWRRR Temp: 25°C Curve: Fc=2-1

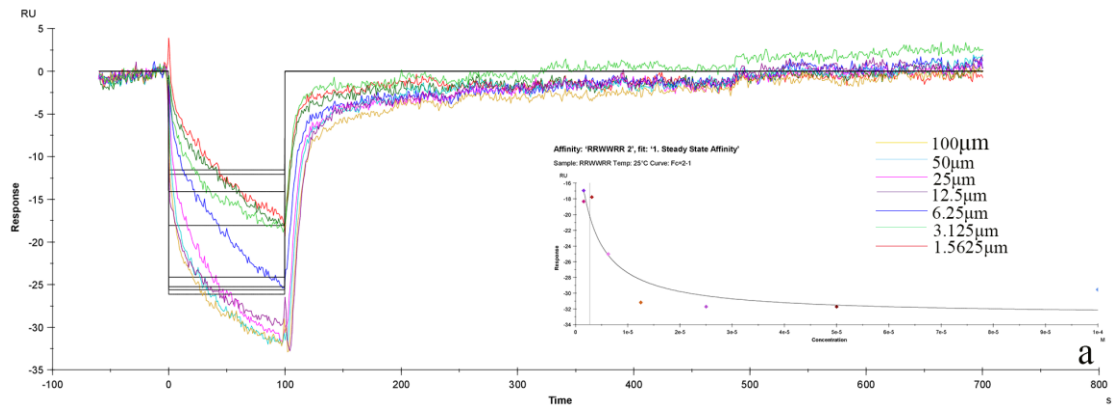

**Kinetics: 'RRQFWF', fit: '1. 1:1 Binding'**

Sample: RRQFWF Temp: 25°C Curve: Fc=2-1

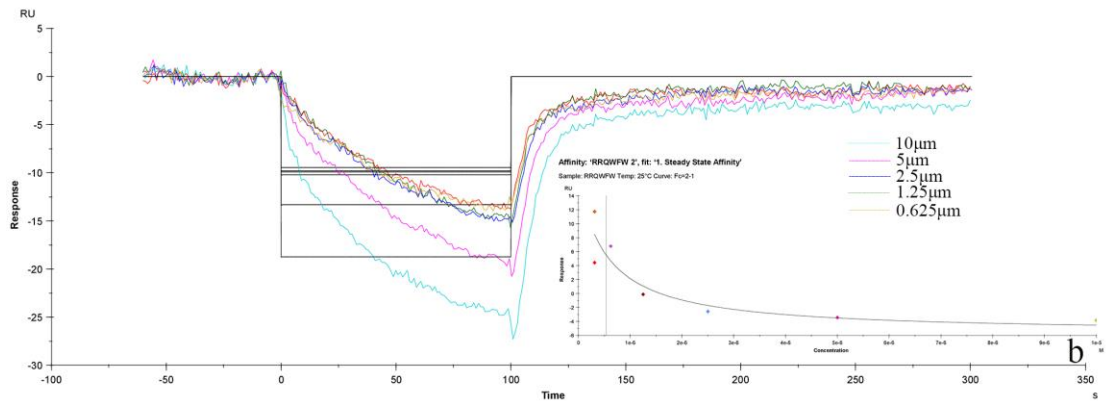

Figure S4. Competitive between PD-1/ PD-L1 and peptides (RRWRR(a)/RRQFWF(b)).
